# Supplementary material for: The Influence of Parental Environmental Exposure and Nutrient Restriction on the Early Life of Offspring Growth in Gambia—A Pilot Study
Source: MDPI journal article supplement (doi:10.3390/ijerph192013045), 2022-10-11
Supplement: s1 [file s1]

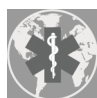

**Table S1.** Socio-demographic characteristics of the participants (n = 339).

| <b>Variable</b>             | <b>Category</b>                       | <b>Frequency</b> | <b>Percentage</b> |
|-----------------------------|---------------------------------------|------------------|-------------------|
| Region of Origin            | Central River Region                  | 14               | 4.1               |
|                             | Upper River Region                    | 7                | 2.1               |
|                             | Lower River Region                    | 16               | 4.7               |
|                             | North Bank                            | 42               | 12.4              |
|                             | Banjul                                | 9                | 2.7               |
|                             | Western Region                        | 182              | 53.7              |
|                             | Kanifing Municipality Council         | 56               | 16.5              |
|                             | Foreigners                            | 13               | 3.8               |
| Child alive or not          | Alive                                 | 335              | 98.8              |
|                             | Dead                                  | 4                | 1.2               |
| Sex of child                | Male                                  | 173              | 51                |
|                             | Female                                | 166              | 49                |
| Marital status              | Married                               | 313              | 92.3              |
|                             | Divorced                              | 7                | 2.1               |
|                             | Single                                | 16               | 4.7               |
|                             | Widow                                 | 3                | 0.9               |
| Occupation of mother        | Housewife                             | 245              | 72.3              |
|                             | Civil servant                         | 38               | 11.2              |
|                             | Farmer                                | 6                | 1.8               |
|                             | Self-employed                         | 38               | 11.2              |
|                             | Others                                | 12               | 3.5               |
| Occupation of father        | Civil servant                         | 212              | 62.5              |
|                             | Farmer                                | 28               | 8.3               |
|                             | Construction worker                   | 46               | 13.6              |
|                             | Not employed                          | 53               | 15.6              |
| Residence of participant    | Municipality regulatory area          | 265              | 78.2              |
|                             | Moderate municipality regulatory area | 41               | 12.1              |
|                             | Non-municipality regulatory area      | 33               | 9.7               |
| Settlement type             | Urban                                 | 312              | 92                |
|                             | Rural                                 | 27               | 8                 |
| Type of bathrooms           | In house bathroom                     | 192              | 56.6              |
|                             | A short distance behind house         | 143              | 42.2              |
|                             | Far from the house (public)           | 4                | 1.2               |
| Highest Education completed | Primary                               | 82               | 24.2              |
|                             | Secondary                             | 136              | 40.1              |

|            |              |     |      |
|------------|--------------|-----|------|
|            | Tertiary     | 59  | 17.4 |
|            | No education | 62  | 18.3 |
| Cooking    | No           | 10  | 2.9  |
|            | Yes          | 329 | 97.1 |
| Cleaning   | No           | 9   | 2.7  |
|            | Yes          | 330 | 97.3 |
| Laundering | No           | 17  | 5    |
|            | Yes          | 322 | 95   |

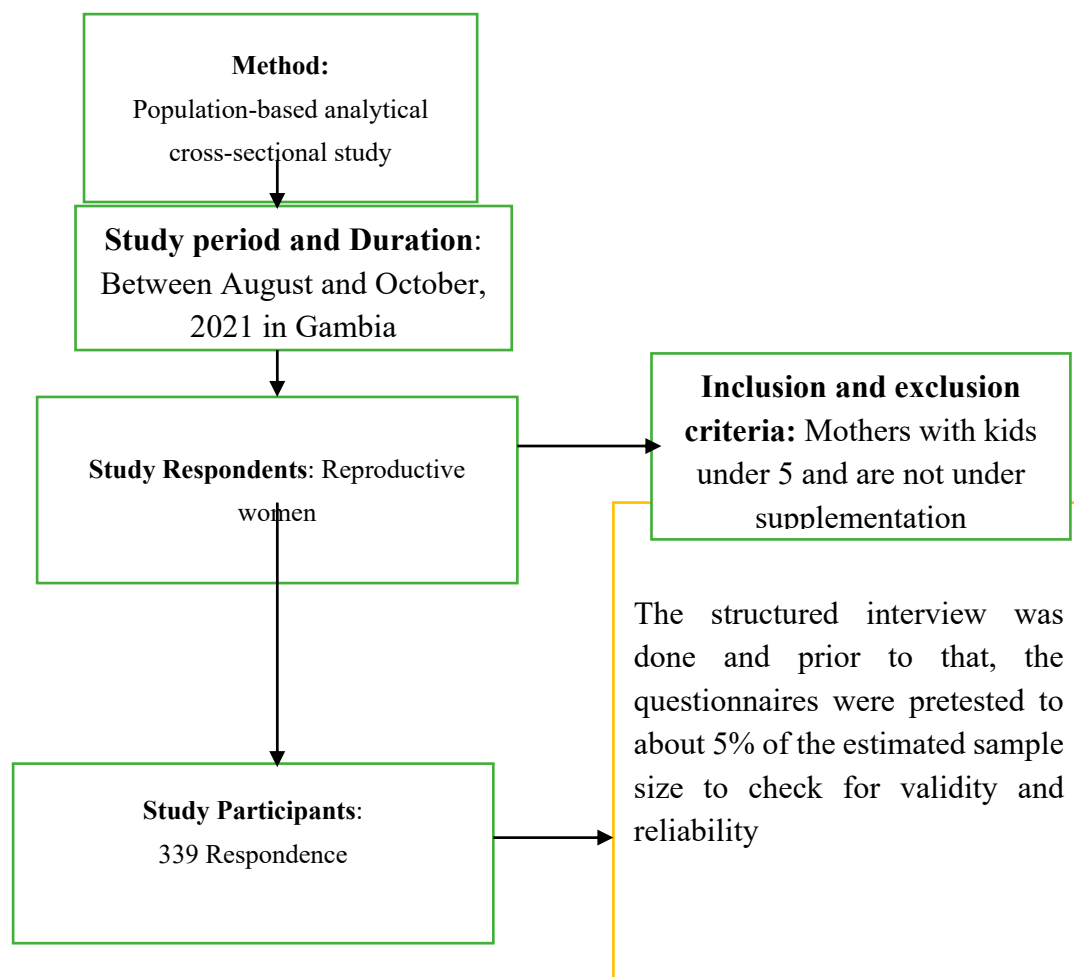

**Figure S1.** The Flow chart of the Experimental design.
